# Supplementary material
Source: Springer Nature journal article supplement (https://www.springermedizin.de/resource/supplementary/12889_2010_2682_MOESM1_ESM.pdf/9487064)
Supplement: MOESM1 [file 9487064]

Hospitals & home birth practitioners identified all women  
who gave birth in:  
South Australia (1<sup>st</sup> September – 26<sup>th</sup> October 2007)  
**n=2900**  
Victoria (1<sup>st</sup> September – 28<sup>th</sup> September 2007)  
**n=5755**

***Excluded:***  
Stillbirths: 41  
Neonatal deaths: 16  
Maternal death: 1

Questionnaires mailed out  
**n= 8,597**

***Excluded:***  
Questionnaires  
'returned to sender'  
n= 80

Completed questionnaires received  
**n=4,415 (4415/8517)**

***Excluded:***  
Births outside study  
period:  
n=49

Total number of participants  
**n= 4,366 (4366/8468)**
